# Supplementary material
Source: Springer Nature journal article supplement (https://www.springermedizin.de/resource/supplementary/13075_2004_1366_MOESM1_ESM.pdf/9689614)

### SF CD45RO<sup>+</sup> lymphocytes

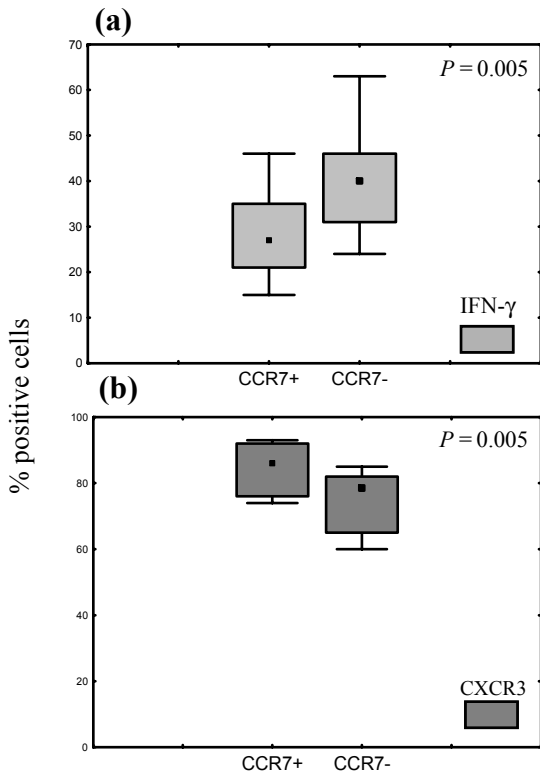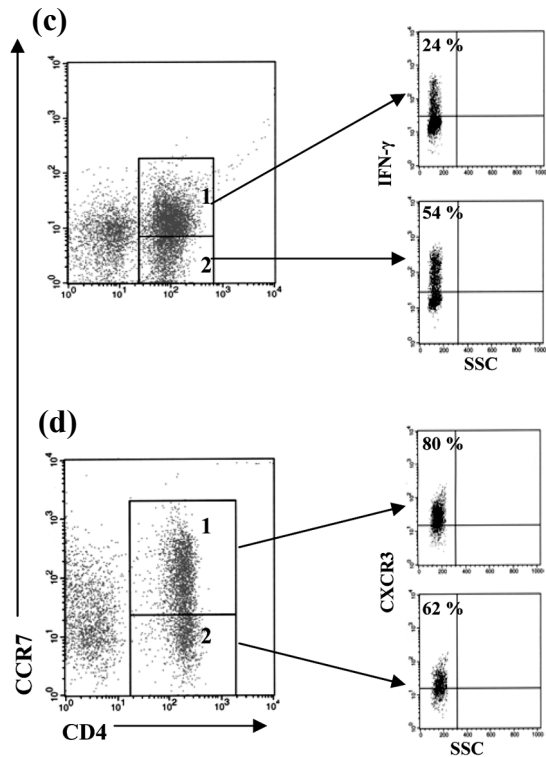

Supplement: MOESM1 [file 9689614]
